# Supplementary material for: Tolerogenic dendritic cells pulsed with islet antigen induce long-term reduction in T-cell autoreactivity in type 1 diabetes patients
Source: PubMed Central journal article supplement (PMC9728525; doi:10.3389/fimmu.2022.1054968), 2022-11-23
Supplement: DataSheet_1.pdf [file DataSheet_1.pdf]

## Supplementary Materials

Table S1. Staining panel for mass cytometry.

| Marker          | Metal   | Clone     | Dilution |
|-----------------|---------|-----------|----------|
| CD3*            | 161Dy   | UCHT1     | 1:600    |
| CD4             | 145Nd   | RPA-T4    | 1:100    |
| CD6*            | 198Pt   | BL-CD6    | 1:100    |
| CD7             | 166Er   | M-T701    | 1:800    |
| CD8a            | 146Nd   | RPA-T8    | 1:800    |
| CD25            | 169Tm   | 2A3       | 1:100    |
| CD27            | 167Er   | O323      | 1:200    |
| CD28*           | 171Yb   | CD28.2    | 1:150    |
| CD38            | 172Yb   | HIT2      | 1:200    |
| CD39*           | 162Dy   | A1        | 1:100    |
| CD45            | 89Y     | HI30      | 1:150    |
| CD45RA          | Qdot655 | MEM-56    | 1:300    |
| CD49b*          | 149Sm   | P1e6c5    | 1:50     |
| CD69            | 144Nd   | FN50      | 1:300    |
| CCR10           | 138Nd   | 6588-5    | 1:40     |
| CD103*          | 155Gd   | Ber-ACT8  | 1:50     |
| CD107 (LAMP)*   | 143Nd   | H4A3      | 1:50     |
| CD127           | 165Ho   | AO19D5    | 1:300    |
| CD152 (CTLA4)*  | 170Er   | 14D3      | 1:40     |
| CD161           | 164Dy   | HP-3G10   | 1:150    |
| CD138 (CXCR3)   | 163Yb   | G025H7    | 1:50     |
| CD185 (CXCR5)   | 173Yb   | J252D4    | 1:100    |
| CD194 (CCR4)*   | 156Gd   | L291H4    | 1:50     |
| CD196 (CCR6)    | 141Pr   | G034E3    | 1:100    |
| CD197 (CCR7)    | 142Nd   | G043H7    | 1:100    |
| CD223 (Lag-3)   | 150Nd   | 11C3C65   | 1:40     |
| CD278 (ICOS)    | 151Eu   | C398      | 1:50     |
| CD279 (PD-1)    | 175Lu   | EH 12.2H7 | 1:50     |
| CD357 (GITR)*   | 159Tb   | 621       | 1:40     |
| CD366 (TIM3)    | 154Sm   | F38-2E2   | 1:50     |
| TIGIT           | 153Eu   | MBSA43    | 1:50     |
| Putrid (GPA33)* | 158Gd   |           | 1:50     |
| HLA-DR*         | 168Er   | L243      | 1:800    |
| LAP (TGF-b)*    | 174Yb   | TW4-2F8   | 1:40     |
| TCRgd           | 152Sm   | 11F2      | 1:50     |
| KLRG-1*         | 160Gd   | REA261    | 1:50     |
| GARP*           | 176Yb   | 7B11      | 1:50     |

\*self-conjugated

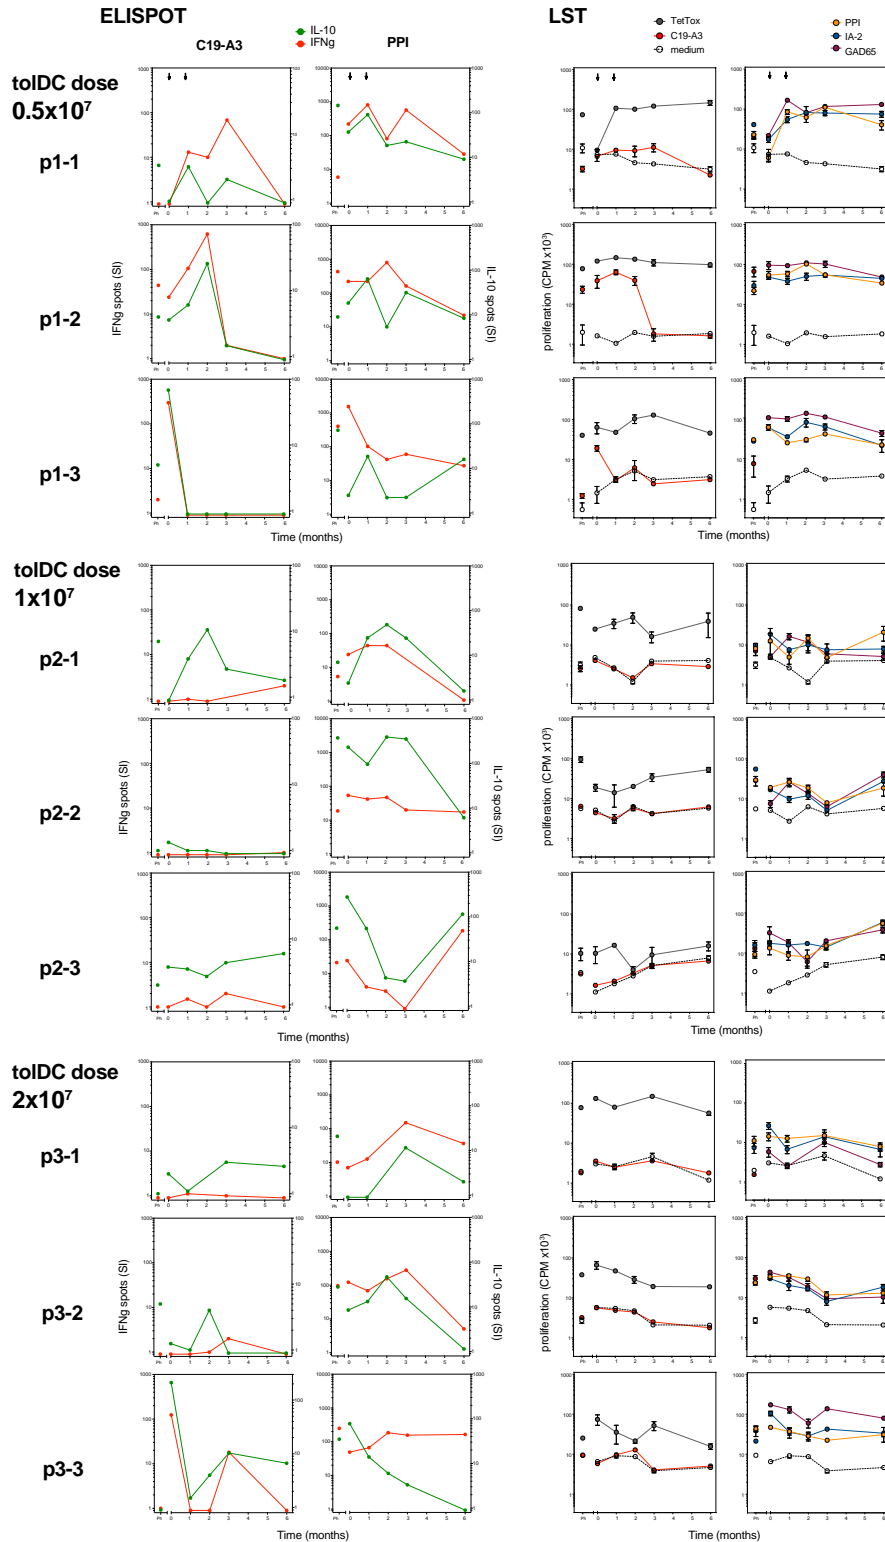

**Fig. S1. Individual patient data for all monitoring timepoints (ELISPOT and LST):** prior to leukapheresis (Ph), at toIDC injections (1<sup>st</sup> = 0; 2<sup>nd</sup> = 1 month) and at 2, 3 and 6 months after start of toIDC treatment. Arrows in the top row of graphs denote timepoints of toIDC injections. Patient graphs are grouped in panels based on the received toIDC dose (top panel =  $5 \times 10^6$ ; middle panel  $10 \times 10^6$ ; bottom panel  $20 \times 10^6$  per toIDC treatment). The left two columns depict cytokine producing cells, expressed in number of spots (green = IL-10 and red = IFN $\gamma$ ), specific to the vaccine peptide (C19-A3) or whole proinsulin protein (PPI) as determined by the ELISPOT assay. Right two columns depict T cell proliferation (CPM) as measured by the lymphocyte stimulation test (LST). Red symbols/lines represent proliferation to C19-A3, grey = TetTox, yellow = PPI, blue = IA-2, dark red = GAD65. White symbols with dashed line represent background proliferation without antigen (medium control).

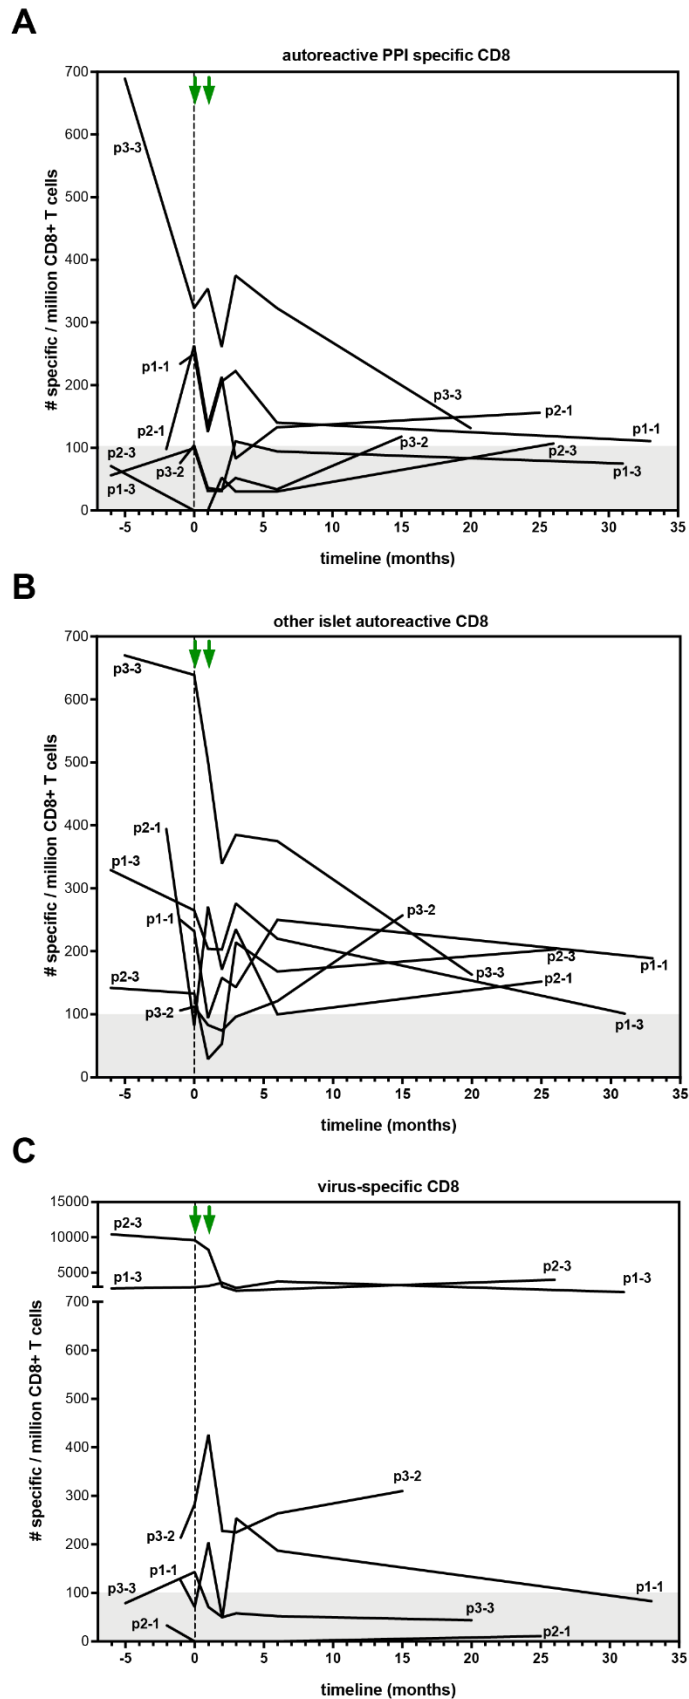

**Fig. S2. Q-dot assay for quantification of antigen-specific CD8<sup>+</sup> T-cells. (A)** Quantification of PPI-specific T-cells (PPI<sub>15-24</sub>, InsB<sub>10-18</sub>, INS-DRIP<sub>1-9</sub>) using Q-dot assay prior to leukapheresis, before tolDC (0) and at different time points after tolDC therapy in six HLA-A2<sup>+</sup> patients. In three patients with the highest PPI-specific T-cell counts prior to therapy, reduction after tolDC therapy was observed, while low numbers of PPI-specific CD8<sup>+</sup> T-cells pre-treatment, remained low. **(B)** CD8 T-cells reactive to peptides from GAD65, IA-2, IGRP, IAPP and ZnT8 and **(C)** virus-specific CD8 T-cells, reacting to CMV, EBV or Measles virus epitopes.

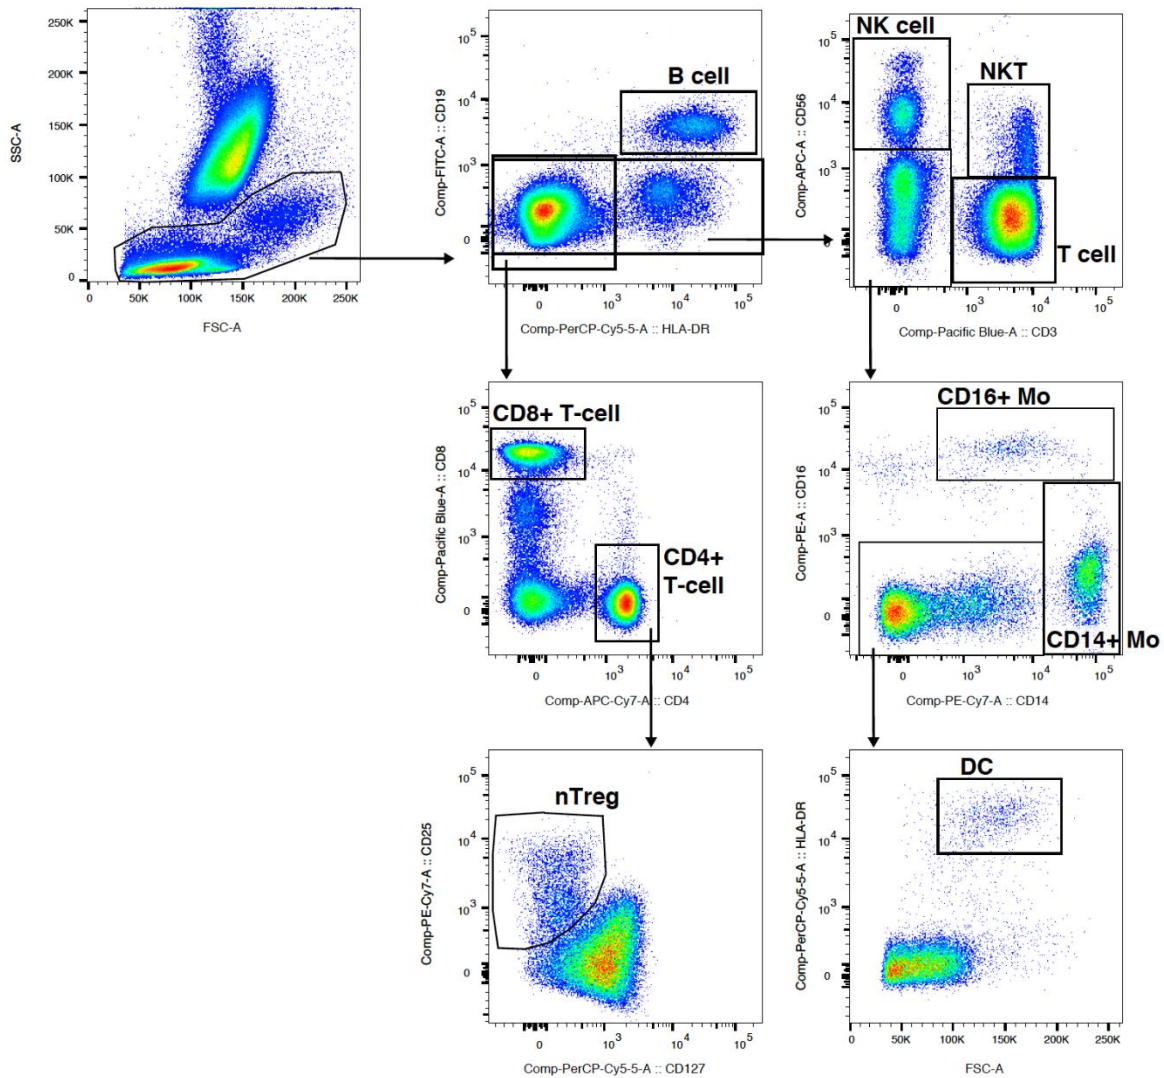

Fig. S3. Gating strategy of flow cytometry data. Major lineages from the innate and adaptive immune system from fresh blood samples are gated for comparison of quantities in time after tolDC treatment (Figure 4).

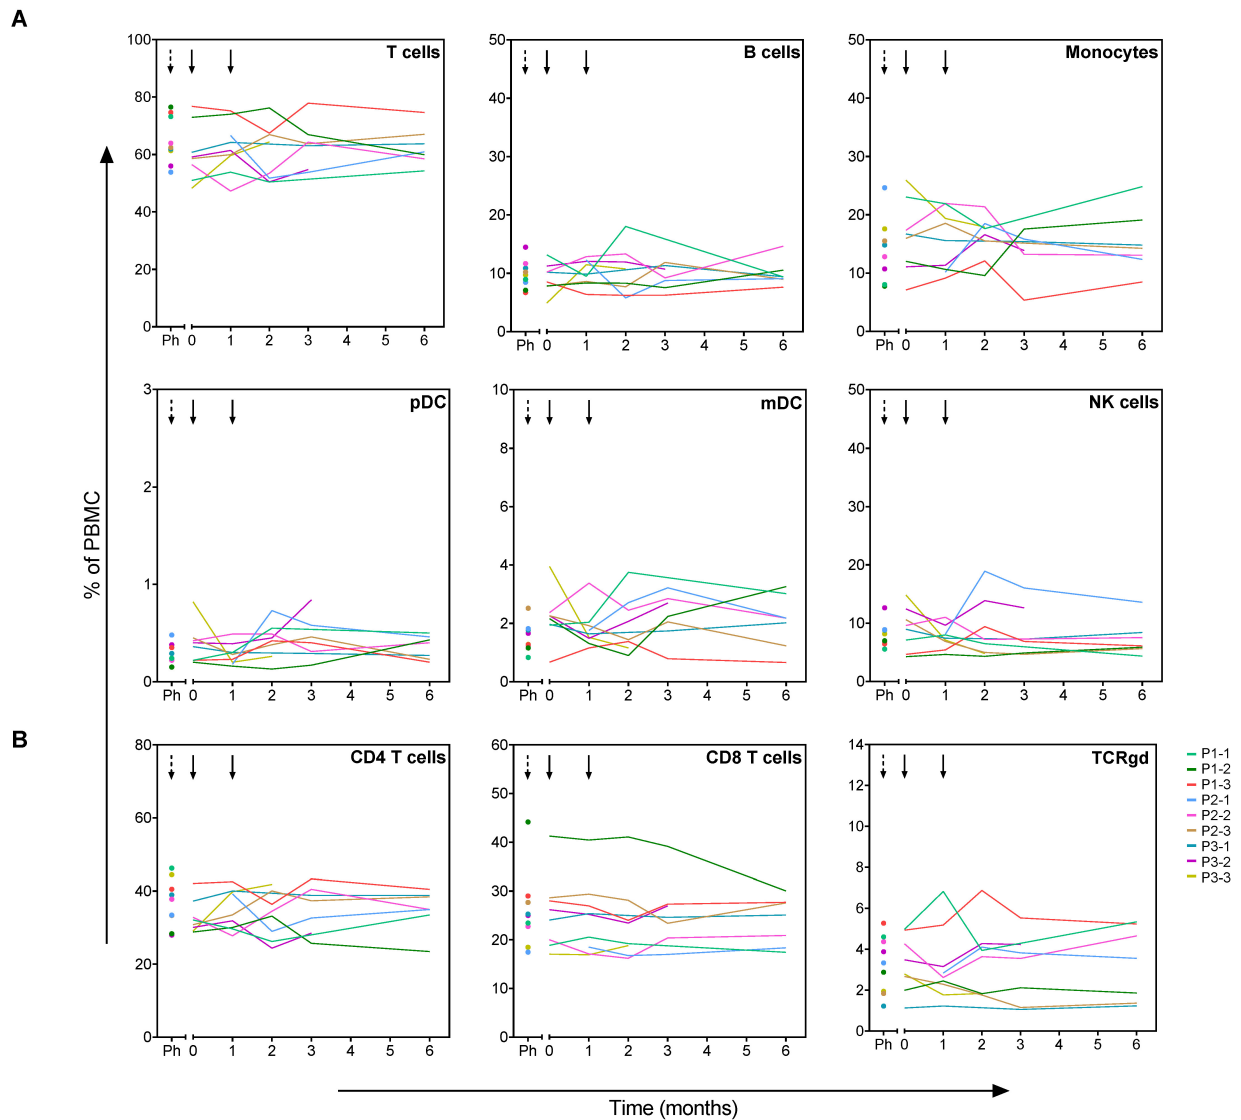

**Fig. S4. Cell frequencies of leukocyte subsets in frozen PBMC.** Frequencies determined by flow cytometry (A) and mass cytometry (B). Timepoint before leukapheresis is indicated with black dashed arrow (Ph) and tolDC treatment with black arrows. No significant changes in major immune populations are observed after tolDC injections.

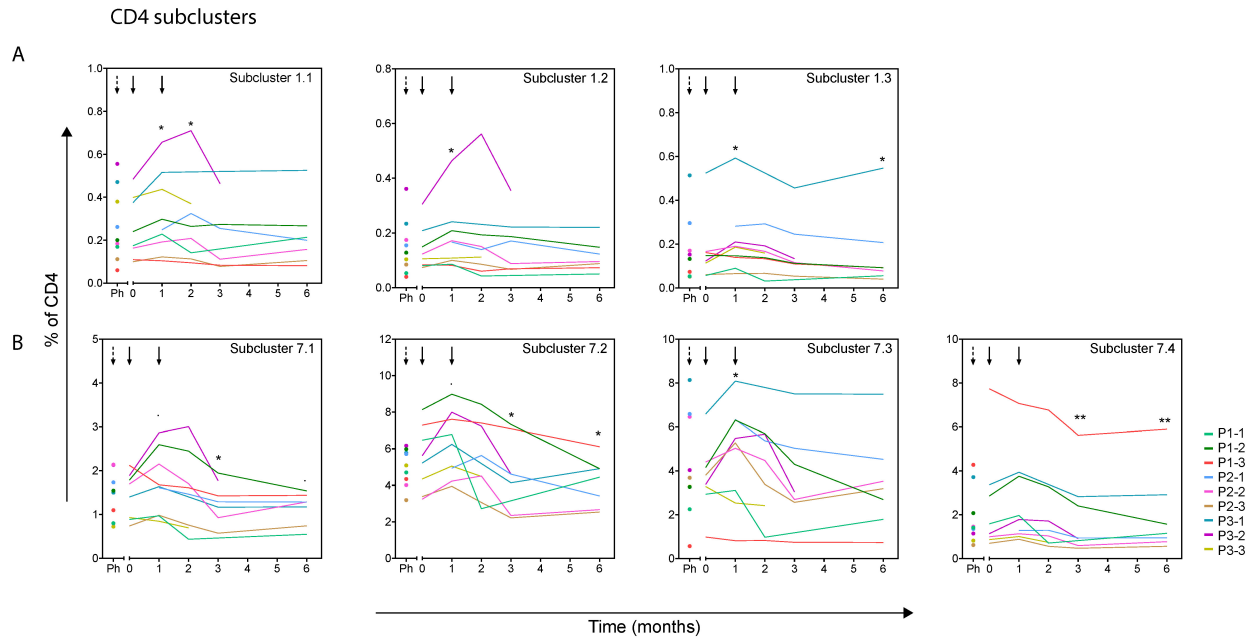

**Fig. S5. Line plots of second level CD4<sup>+</sup> T-cell subclusters that significantly change after toIDC injection.** (A) Significant subclusters derived from Trm (CD103<sup>+</sup>) cluster 1 (1.1-1.3) and (B) memory cluster 7 with CCR6 expression (7.1-7.4), showing an increase 1 month after the 1<sup>st</sup> toIDC injection. Subcluster 7.1, 7.2 and 7.4 showed significant decrease after the 2<sup>nd</sup> toIDC injection compared to baseline frequencies.

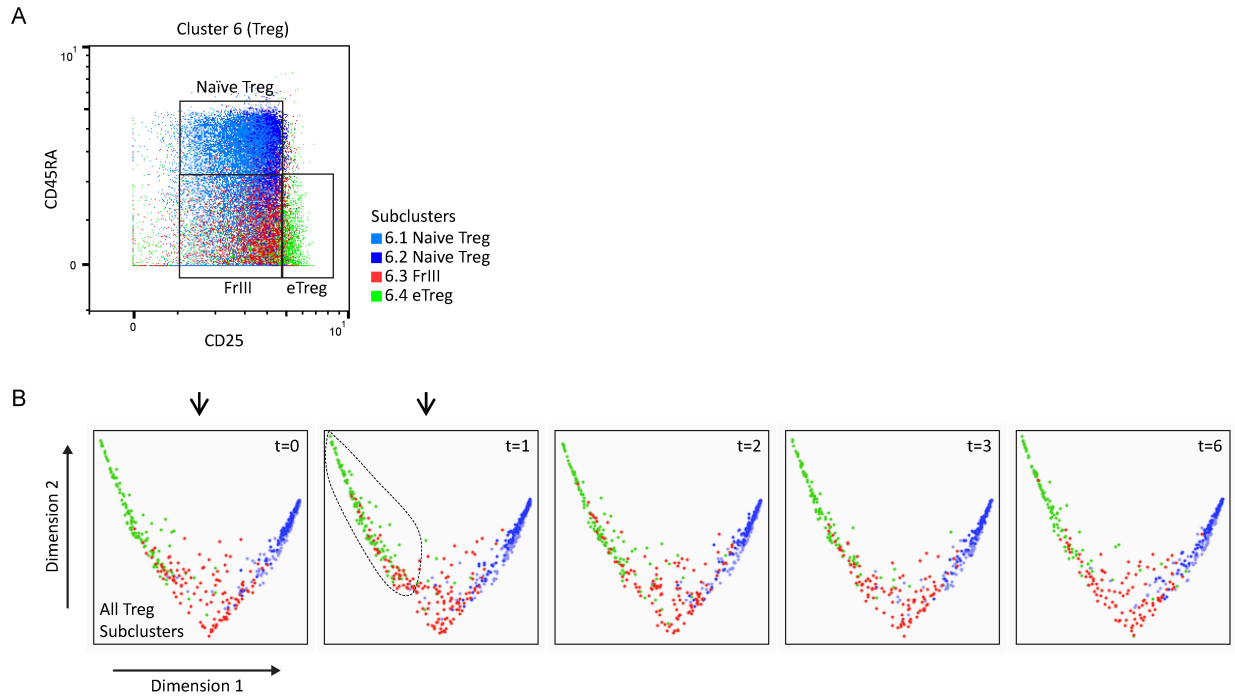

**Fig. S6. Second level subclusters of Tregs (A)** Treg subclusters as determined by Cytosplore visualized in conventional gating view for FACS analysis. **(B)** Diffusion map of Treg cluster 6. Cells from each timepoint are visualized in a different plot. Arrows indicate time of toIDC injection and time is indicated in months.

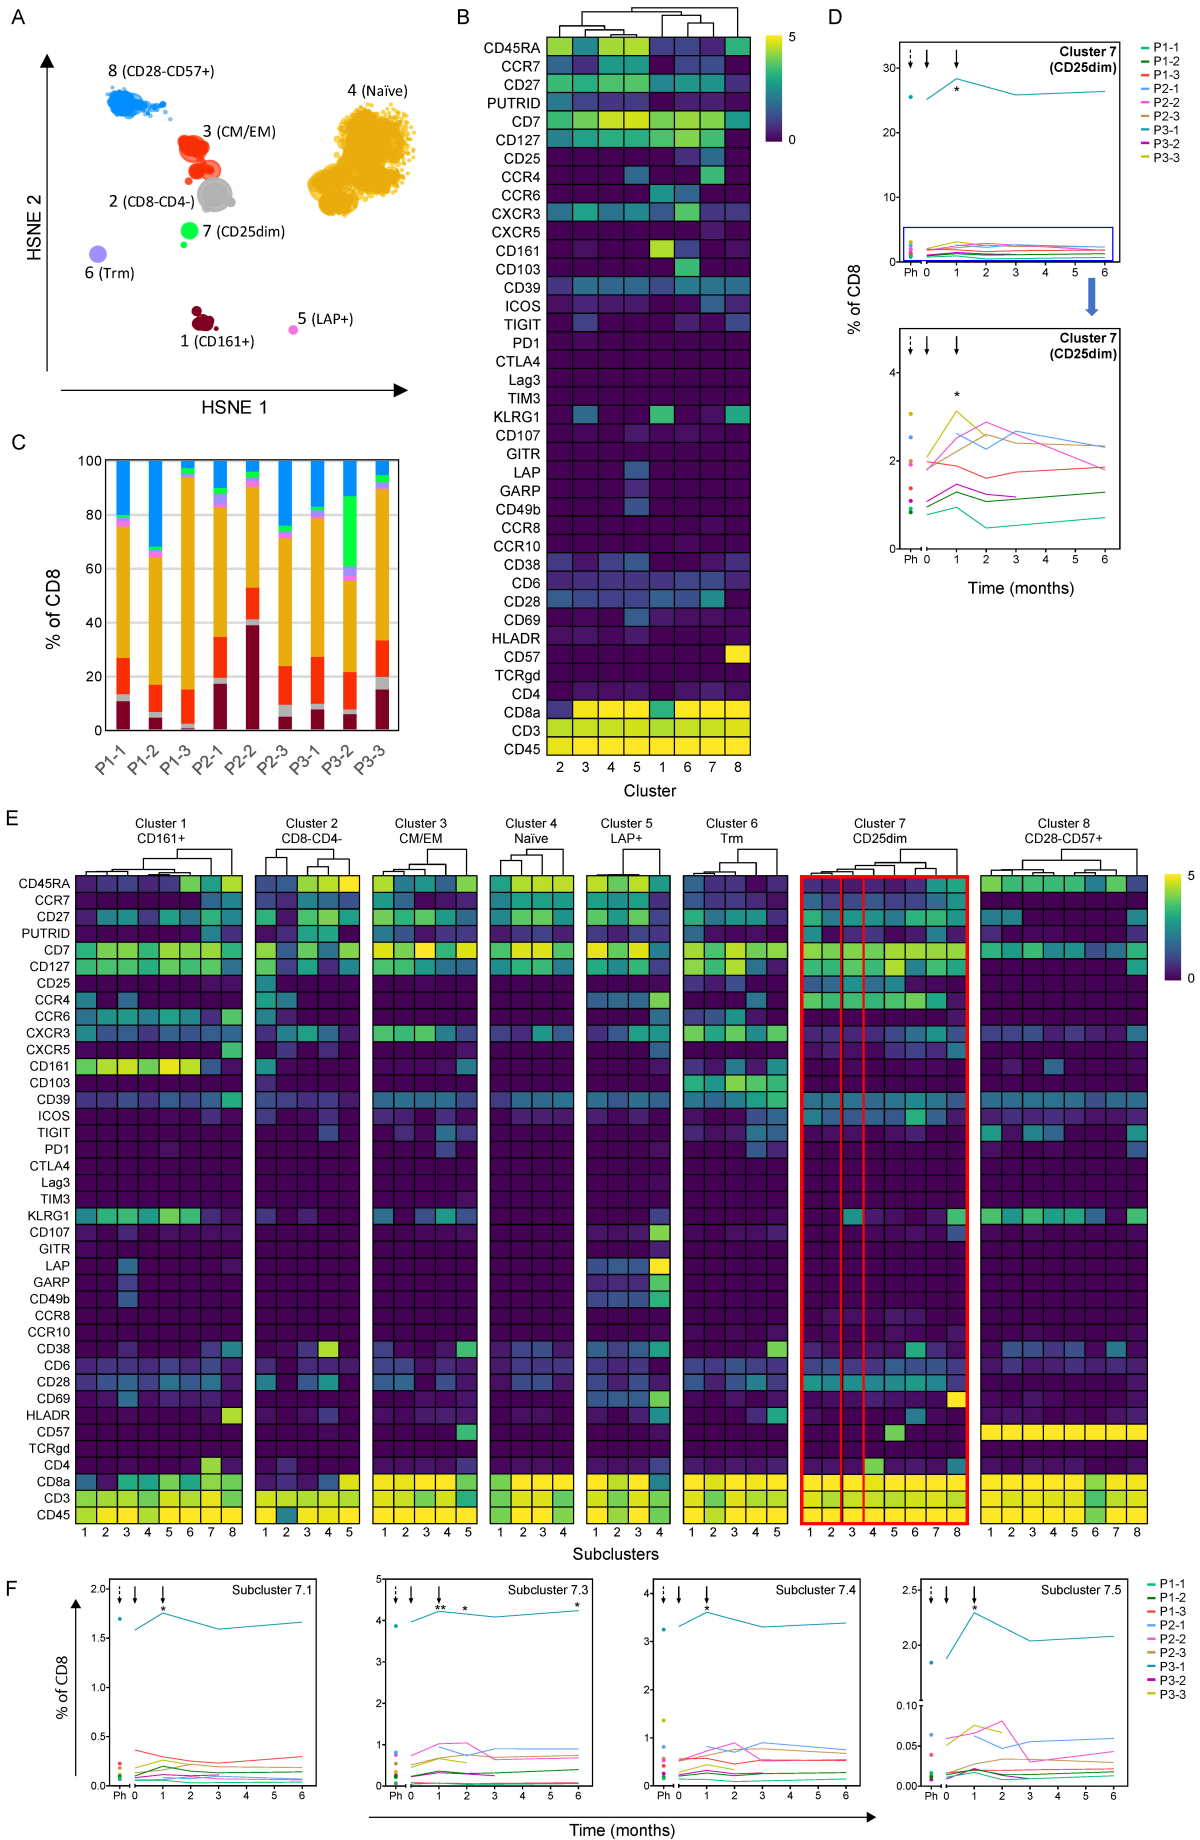



**Fig. S7. CyTOF analysis of the CD8<sup>+</sup> T-cell compartment.** Analysis of CD8<sup>+</sup> T-cells from different timepoints before and after tolDC treatment (n=9). **(A)** HSNE map of the CD8<sup>+</sup> T-cell compartment at the overview level (level 1) shows eight major clusters. **(B)** Heatmap visualizing the phenotype of the major CD8<sup>+</sup> T-cell clusters. **(C)** Distribution of major clusters within each patient (all timepoints combined). Colors correspond to clusters represented in the HSNE map in A. **(D)** Line plot of significant cluster 7, showing change in frequency after tolDC injection ( $p=0.0029$ ). Each line represents one patient and arrows indicate time of tolDC injection. The bottom panel displays a close up of the boxed area in the left panel. **(E)** Heatmap of subclusters of CD8<sup>+</sup> T-cells. Boxes indicate significant clusters. **(F)** CD8<sup>+</sup> T-cell subclusters that significantly change after tolDC injection. Arrows indicate time of tolDC injection and each line represents one patient.

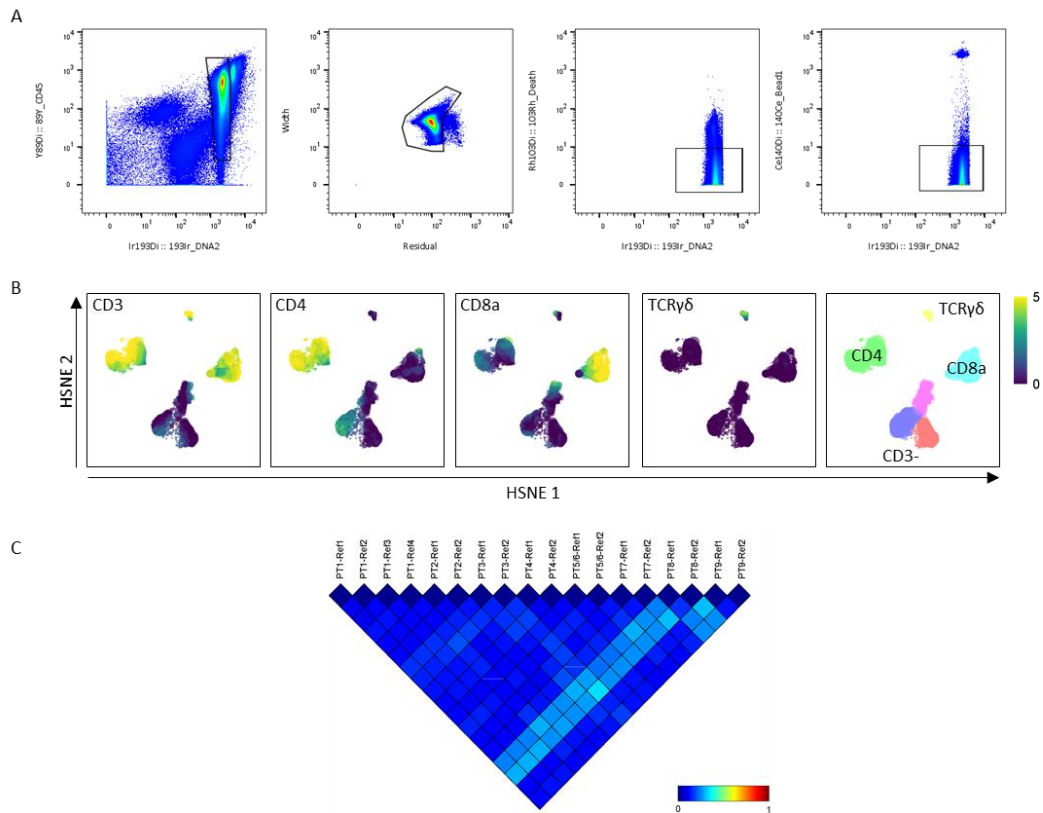

**Fig. S8. Gating and quality control of CyTOF dataset.** A) Gating strategy of CyTOF data to select for CD45<sup>+</sup> cells. Doublets, dead cells and beads were excluded. B) T-cell populations were identified within CD45<sup>+</sup> cells using HSNE analysis. C) Jensen-Shannon (JS) plot of reference samples visualizes the consistency of the staining between experiment days. Similarity between tSNE maps of reference samples are measured by the Jensen-Shannon divergence, values are shown between 0 (min) to 1 (max). Per staining, one reference sample was stained alongside the patient samples and subsequently split into different batches to measure at the start and end of each measurement day (1-2).
